# Supplementary material for: Nocturnal Road Traffic Noise Exposure and Children’s Sleep Duration and Sleep Problems
Source: Int J Environ Res Public Health. 2017 May 6;14(5):491. doi: 10.3390/ijerph14050491 (PMC5451942; doi:10.3390/ijerph14050491)
Supplement: Supplementary file 1 [file ijerph-14-00491-s001.pdf]

# Supplemental Material

## Nocturnal Road Traffic Noise Exposure and Children's Sleep Duration and Sleep Problems

Weyde, Kjell Vegard<sup>a</sup>  
Krog, Norun Hjertager<sup>a</sup>  
Ofstedal, Bente<sup>a</sup>  
Evandt, Jorunn<sup>a</sup>  
Magnus, Per<sup>b, c</sup>  
Øverland, Simon<sup>d, e</sup>  
Clark, Charlotte<sup>f</sup>  
Stansfeld, Stephen<sup>f</sup>  
Aasvang, Gunn Marit<sup>a</sup>

<sup>a</sup>Department of Air Pollution and Noise, Norwegian Institute of Public Health, Oslo, Norway

<sup>b</sup>Domain of Health Data and Digitalization, Norwegian Institute of Public Health, Oslo, Norway

<sup>c</sup>Institute of Health and Society, Faculty of Medicine, University of Oslo, Oslo, Norway

<sup>d</sup>Division of Mental Health, Norwegian Institute of Public Health, Bergen, Norway

<sup>e</sup>Faculty of Psychology, University of Bergen, Bergen, Norway

<sup>f</sup>Centre for Psychiatry, Wolfson Institute of Preventive Medicine, Barts and the London School of Medicine, Queen Mary University of London, London, United Kingdom

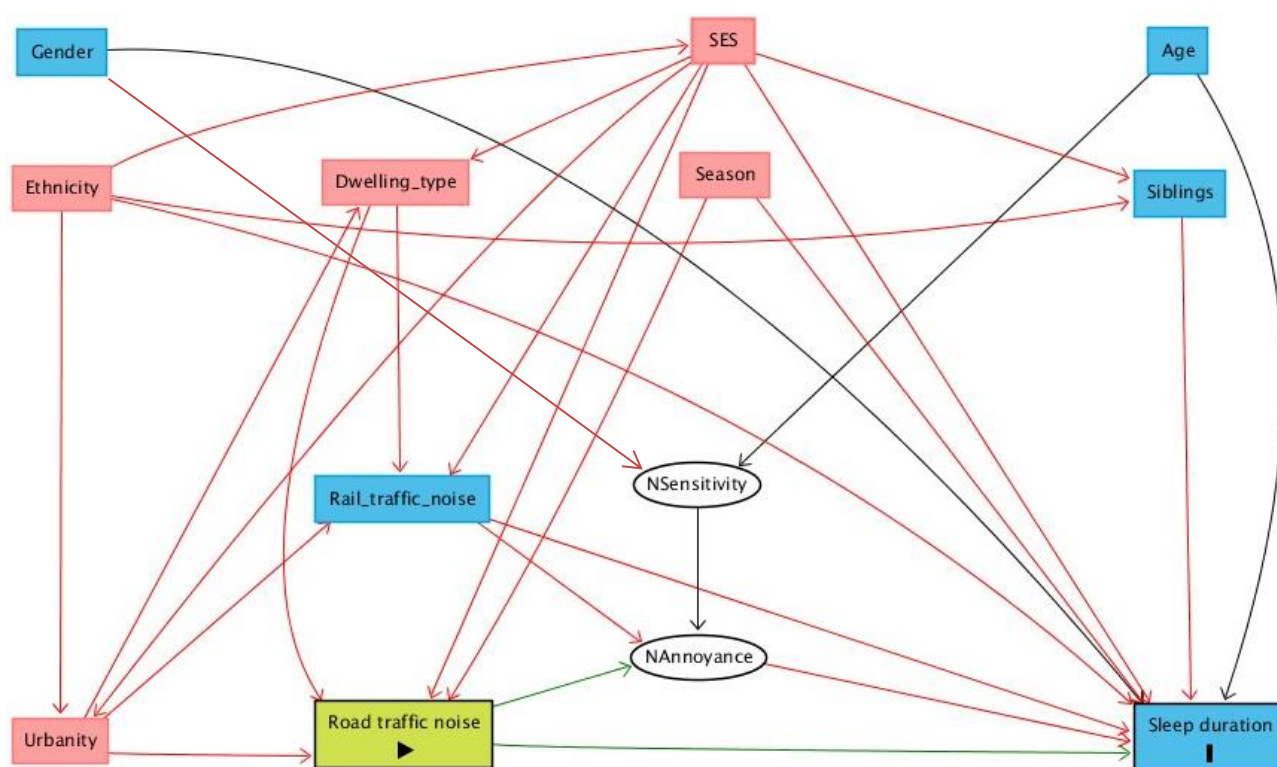

**Figure S1: Directed acyclic graphs used in the selection of covariates.**

SES includes annual gross household income and maternal education

**Table S1: Characteristics of the study sample, by gender and noise categories.**

|                                                             | Girls (N=1331)   |                  |                 |                  | Boys (N=1334)    |                   |                 |                  |
|-------------------------------------------------------------|------------------|------------------|-----------------|------------------|------------------|-------------------|-----------------|------------------|
|                                                             | <40dB            | 40-50dB          | >50dB           | Total            | <40dB            | 40-50dB           | >50dB           | Total            |
| N (%)                                                       | 208 (15.6)       | 657 (49.4)       | 466 (35.0)      | 1331             | 247 (18.5)       | 664 (49.8)        | 423 (31.7)      | 1334             |
| Sleep duration (%)                                          |                  |                  |                 |                  |                  |                   |                 |                  |
| >10h                                                        | 19.2             | 50.0             | 30.8            | N=386<br>(29.0%) | 18.8             | 48.0              | 33.2            | N=346<br>(25.9%) |
| 10h                                                         | 14.3             | 49.5             | 36.2            | N=768<br>(57.7%) | 18.8             | 51.1              | 30.1            | N=765<br>(57.4%) |
| <10h                                                        | 13.6             | 47.5             | 39.0            | N=177<br>(13.3%) | 17.0             | 48.0              | 35.0            | N=223<br>(16.7%) |
| Sleep problems (% yes)                                      | 1.9              | 2.3              | 4.1             | 2.9              | 3.2              | 2.6               | 3.1             | 2.9              |
| Gross annual household income <sup>a</sup> (NOK), mean (SD) | 1056719 (800632) | 1038648 (649425) | 943156 (749891) | 1008039 (711831) | 1058640 (574518) | 1101628 (1131490) | 839826 (358902) | 1010653 (867338) |
| Season, questionnaire completion (%)                        |                  |                  |                 |                  |                  |                   |                 |                  |
| Winter                                                      | 17.7             | 46.6             | 35.7            | 22.1             | 21.1             | 47.0              | 31.9            | 25.2             |
| Spring                                                      | 13.8             | 49.2             | 37.1            | 22.9             | 18.4             | 47.9              | 33.7            | 24.9             |
| Summer                                                      | 16.0             | 49.5             | 34.6            | 22.6             | 15.1             | 54.8              | 30.2            | 18.9             |
| Fall                                                        | 15.3             | 51.3             | 33.4            | 32.4             | 18.6             | 50.5              | 30.9            | 31.0             |
| Urbanity <sup>b</sup> (%)                                   |                  |                  |                 |                  |                  |                   |                 |                  |
| Outskirts                                                   | 18.3             | 53.3             | 28.5            | 71.2             | 22.2             | 53.4              | 24.5            | 72.3             |
| Semi-central                                                | 11.4             | 47.9             | 40.8            | 21.2             | 10.9             | 49.4              | 39.6            | 19.9             |
| Center                                                      | 3.0              | 16.8             | 80.2            | 7.6              | 3.9              | 17.3              | 78.9            | 7.8              |
| Age (months), mean (SD)                                     | 85.5 (1.5)       | 85.4 (1.6)       | 85.4 (1.6)      | 85.4 (1.6)       | 85.4 (1.5)       | 85.4 (1.5)        | 85.4 (1.7)      | 85.3 (1.6)       |
| Mother's education (%)                                      |                  |                  |                 |                  |                  |                   |                 |                  |
| >4 years univ/college                                       | 15.3             | 52.2             | 32.5            | 41.2             | 19.1             | 52.0              | 28.9            | 42.0             |
| ≤4 years univ/college                                       | 16.5             | 47.5             | 36.0            | 44.1             | 19.2             | 49.3              | 31.5            | 44.2             |
| High school                                                 | 13.8             | 46.9             | 39.3            | 14.7             | 14.7             | 44.6              | 40.8            | 13.8             |
| Ethnicity <sup>c</sup> (%)                                  |                  |                  |                 |                  |                  |                   |                 |                  |
| Non-western                                                 | 12.7             | 40.5             | 46.8            | 9.5              | 17.1             | 38.8              | 44.1            | 11.4             |
| Western                                                     | 15.9             | 50.3             | 33.8            | 90.5             | 18.7             | 51.2              | 30.1            | 88.6             |
| Siblings < age 4 (%)                                        |                  |                  |                 |                  |                  |                   |                 |                  |
| Yes                                                         | 16.7             | 50.6             | 32.7            | 37.4             | 19.5             | 49.0              | 31.6            | 36.6             |
| No                                                          | 15.0             | 48.8             | 36.4            | 62.6             | 18.0             | 50.2              | 31.8            | 63.4             |
| Type of building (%)                                        |                  |                  |                 |                  |                  |                   |                 |                  |
| Detached house                                              | 14.7             | 57.5             | 27.8            | 20.0             | 23.3             | 57.9              | 18.8            | 24.7             |
| Semi-detached                                               | 17.8             | 54.8             | 27.5            | 48.7             | 21.1             | 53.2              | 25.7            | 44.0             |
| Apartment                                                   | 13.0             | 35.7             | 51.3            | 31.3             | 11.0             | 38.6              | 50.4            | 31.3             |
| Rail traffic noise (L <sub>eq</sub> )                       |                  |                  |                 |                  |                  |                   |                 |                  |
| 0 dB                                                        | 61.5             | 46.3             | 41.4            | 47.0             | 57.9             | 50.5              | 40.0            | 48.5             |
| ≤30 dB                                                      | 22.6             | 26.2             | 17.4            | 22.5             | 18.2             | 23.3              | 17.3            | 20.5             |
| >30 dB                                                      | 15.9             | 27.6             | 41.2            | 30.5             | 23.9             | 26.2              | 42.8            | 31.0             |

<sup>a</sup>Adjusted according to consumer price index<sup>b</sup>Outskirts: outside the Ring 3 road; Between: between roads Ring 2 and Ring 3; Center: inside Ring 2 road. The covariate indicated how far the children lived from the city center.<sup>c</sup>Dichotomized according to Statistics Norway [50].
